# Supplementary material
Source: HighWire-hosted journal article supplement (https://molpharm.aspetjournals.org/highwire/filestream/76786/field_highwire_adjunct_files/11/Supplementary_Table_S8.pdf)
Supplement: Supplementary_Table_S8.pdf [file Supplementary_Table_S8.pdf]

Identification of Survival Genes in Human Glioblastoma Cells Using siRNA Screening

Nikhil G Thaker, Fang Zhang, Peter R. McDonald, Tong Ying Shun, Michael D Lewen, Ian F. Pollack, and John S. Lazo

Molecular Pharmacology

Supplementary Table S8  
siRNA sequences for targeting PSMB3, PSMB4,  
DDX39 and RAN.

|                     |                    | <u>Sense siRNA sequence</u> | <u>Antisense siRNA sequence</u> |
|---------------------|--------------------|-----------------------------|---------------------------------|
| <b><u>PSMB4</u></b> | Duplex<br><b>A</b> | GCUAUAGUCCUAGAGCUAUtt       | AUAGCUCUAGGACUUAUAGCtg          |
|                     | Duplex<br><b>B</b> | GCUAUUCAUUCAUGGCUGAtt       | UCAGCCAUGAAUGAAUAGCtc           |
|                     | Duplex<br><b>C</b> | GAUGGACACAGCUAUAGUCtt       | GACUAUAGCUGUGUCCAUCtc           |
| <b><u>PSMA3</u></b> | Duplex<br><b>A</b> | GCUAUUGGAAUCAGAUGCAtt       | UGCAUCUGAUUCCAAUAGCtg           |
|                     | Duplex<br><b>B</b> | GAUGCUCGUUCUUUAGCAGtt       | CUGCUAAGAAGACGAGCAUCtg          |
|                     | Duplex<br><b>C</b> | GGCUGUGGAAAUAUAGUAGUtt      | ACUACUAUUUCCACAGCctt            |
| <b><u>DDX39</u></b> | Duplex<br><b>A</b> | GGGAUCCUACGUUUCCAUCtt       | GAUGGAAACGUAGGAUCCctt           |
|                     | Duplex<br><b>B</b> | GGUCCAGCAUGAGUGCAUUt        | AAUGCACUCAUGCUGGACctc           |
|                     | Duplex<br><b>C</b> | GGAUGAAGAAGUGUUGAAGtt       | CUUCAACACUUCUUAUCctt            |
| <b><u>RAN</u></b>   | Duplex<br><b>A</b> | CGCAGUUGAUUCCUUGAGUtt       | ACUCAAGGAAUCAACUGCGtc           |
|                     | Duplex<br><b>B</b> | GCUCAUUGGAGACCCUAActt       | GUUAGGGUCUCCAAUGAGCtt           |
|                     | Duplex<br><b>C</b> | CCGAAAGAAGAAUCUUCAGtt       | CUGAAGAUUCUUCUUCGGtg            |
